# Supplementary material
Source: PubMed Central journal article supplement (PMC3958114)
Supplement: JVI.03237-13_zjv999098715so3.pdf [file JVI.03237-13_zjv999098715so3.pdf]

## **Legends for movies in Supplementary Material**

### **Movie S1**

#### **Morphology of extracellular pestivirions depicted by single tilt electron tomography.**

The visualization allows detailed insight into numerous cross-sections of extracellular pestivirus particles which are captured between two cells. Electron tomography reveals a detachment of both layers of the double lipid membrane from the capsid in several virions of this section.

Each single picture of the movie corresponds to a 0.5 nm-thick digital section (orthoslice) through the tomogram moving along the tomographic Z-axis.

### **Movie S2**

#### **Budding of a pestivirus at the ER membrane depicted by single tilt electron tomography.**

The visualization allows detailed insight into numerous cross-sections of a budding pestivirus leading to a complete imagination of the process for the viewer.

Each single picture of the movie corresponds to a 0.5 nm-thick digital section (orthoslice) through the tomogram moving along the tomographic Z-axis.
